# Supplementary material for: Activating hierarchically hortensia-like CoAl layered double hydroxides by alkaline etching and anion modulation strategies for the efficient oxygen evolution reaction
Source: Royal Society of Chemistry journal article supplement (doi:10.1039/c9dt00538b), 2019-01-01
Supplement: c9dt00538b1.pdf [file c9dt00538b1.pdf]

## Supporting Information

### **Activating hierarchically hortensia-like CoAl layered double hydroxide by alkaline etching and anion modulation strategy for efficient oxygen evolution reaction**

Xiaoxue Guo,<sup>‡</sup> Fang Wu,<sup>‡</sup> Gazi Hao, Shisi Peng, Ning Wang, Qiulin Li, Yubing Hu\* and Wei Jiang\*

School of Chemical Engineering, Nanjing University of Science and Technology, Nanjing 210094,  
China.

E-mail: [superfine\\_jw@126.com](mailto:superfine_jw@126.com), [hyb@njust.edu.cn](mailto:hyb@njust.edu.cn)

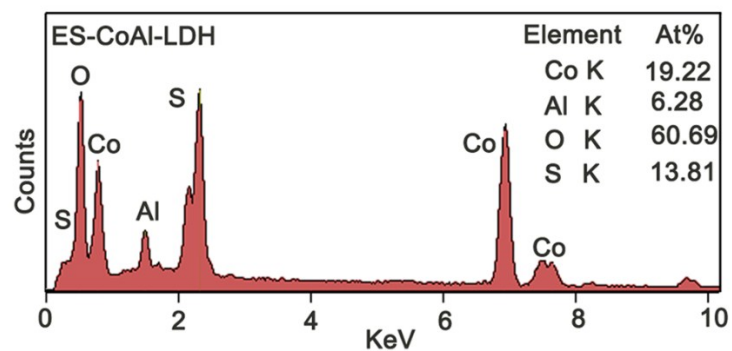

Figure S1 EDX spectrum of ES-CoAl-LDH.

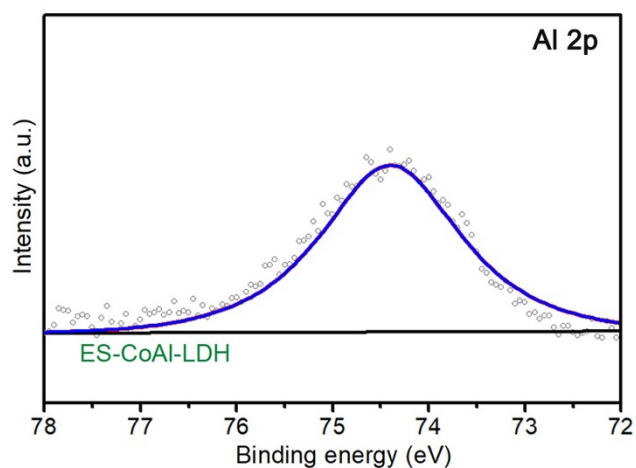

Figure S2 High resolution XPS spectra of Al 2p peak of ES-CoAl-LDH.

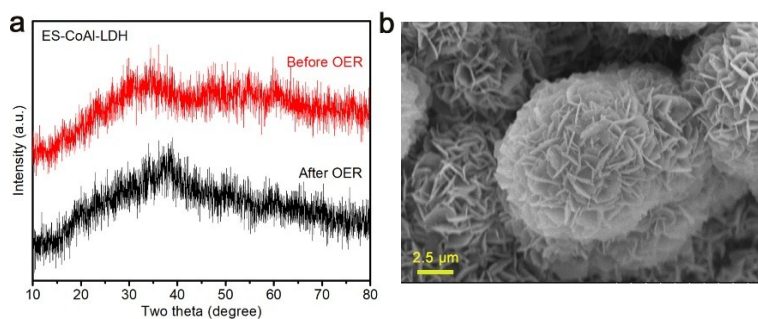

Figure S3 (a) XRD pattern (b) SEM image of ES-CoAl-LDH after Chronopotentiometric measurements test over 26 h.

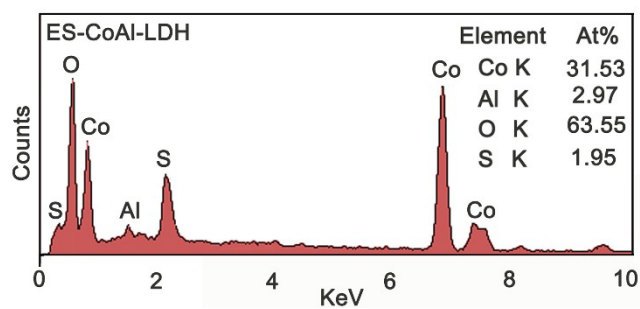

Figure S4 EDX spectrum of ES-CoAl-LDH after Chronopotentiometric measurements test over 26 h.

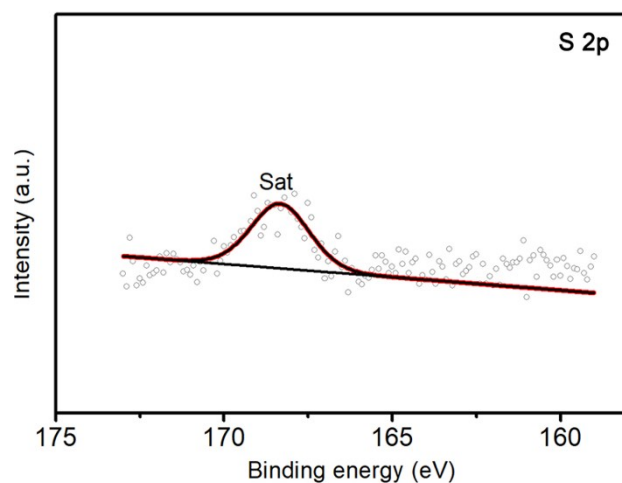

Figure S5 XPS spectrum of S 2p of ES-CoAl-LDH after Chronopotentiometric measurements test over 26 h.

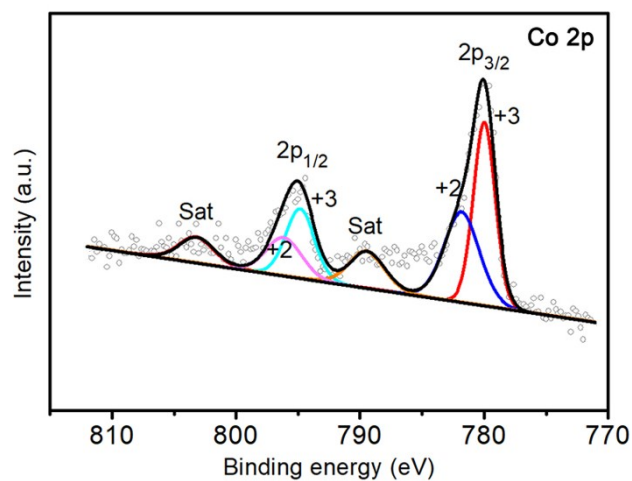

Figure S6 XPS spectrum of Co 2p of ES-CoAl-LDH after Chronopotentiometric measurements test over 26 h.

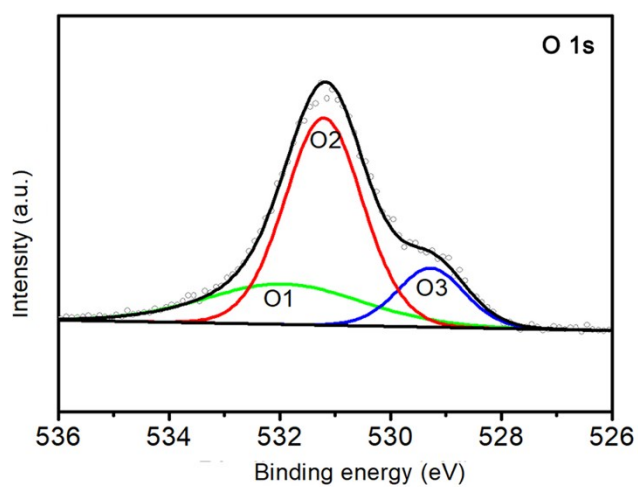

Figure S7 XPS spectrum of O 1s of ES-CoAl-LDH after Chronopotentiometric measurements test over 26 h.

over 26 h.

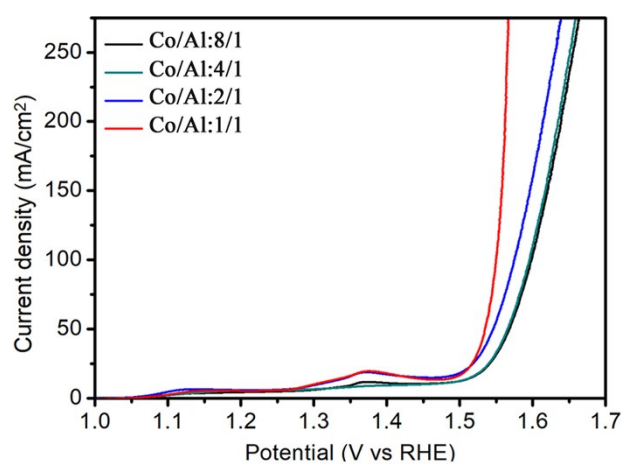

Figure S8 Polarization curves of ES-CoAl-LDH prepared with different Co/Al ratio.

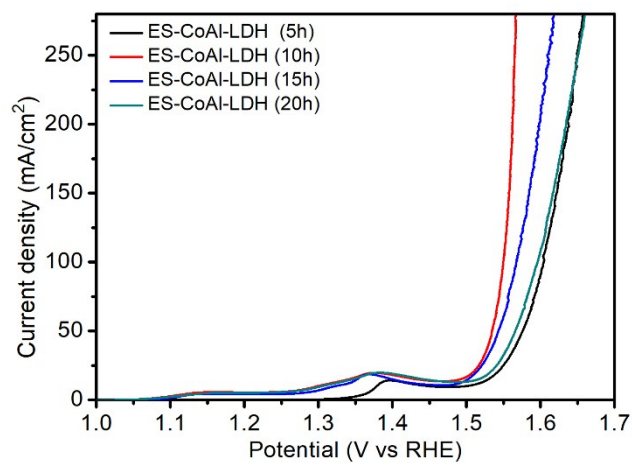

Figure S9 Polarization curves of ES-CoAl-LDH after KOH etching for different time.
